# Supplementary material for: Prokaryotic and Eukaryotic Fecal Microbiota in Irritable Bowel Syndrome Patients and Healthy Individuals Colonized With Blastocystis
Source: Front Microbiol. 2021 Sep 17;12:713347. doi: 10.3389/fmicb.2021.713347 (PMC8486285; doi:10.3389/fmicb.2021.713347)
Supplement: Supplementary Table 2 — Demographic characteristics and clinical data of patients included. F, female; M, male; nd, not determined; na, not applicable. [file Table_2.XLSX]

## Sheet: TableS2
Group	Sample number	Age	Sex	Francis Score	Symptoms	Ongoing treatment	Blastocystis PCR	Blastocystis ST	Dientamoeba fragilis PCR	BMI
IBS patients	IBS1	66	F	411	constipation, bloating	levodopa, rasagiline, fenofibrate, alprazolam, bisacodyl, sodium bicarbonate	Negative	0	Negative	26.7
	IBS2	44	F	325	constipation	none	Negative	0	Negative	18.5
	IBS3	47	M	360	hypogastric abdominal pain attacks	none	Negative	0	Negative	21.2
	IBS4	46	F	187	chronic constipation, bloating, intermittent abdominal pain	none	Positive	3	Positive	23.7
	IBS5	29	M	330	variable abdominal pain, post-meal bloating, alternating diarrhea and constipation	none	Negative	0	Negative	16.9
	IBS6	44	F	381	abdominal pain predominant in the left flank, improved by defecation, associated with bloating	none	Negative	0	Negative	35.8
	IBS7	61	M	258	diffuse abdominal pain predominantly in hypogastrium, generalized anxiety disorders	none	Negative	0	Negative	25.2
	IBS8	67	F	263	constipation	none	Negative	0	Negative	23.1
	IBS9	28	F	426	constipation	none	Negative	0	Positive	24.6
	IBS10	65	F	375	constipation, heartburn	trimébutine	Negative	0	Negative	23.8
	IBS11	67	F	257	constipation	none	Positive	4	Positive	19.6
	IBS12	60	F	378	constipation	none	Positive	7	Negative	35
	IBS13	64	F	91	constipation, bloating	eseridine, lactulose, ispaghul	Negative	0	Negative	21.2
	IBS14	55	F	284	constipation, fibromyalgia	none	Positive	4	Negative	21
	IBS15	50	F	450	rather irregular transit like constipation, bloating, abdominal pain	none	Negative	0	Negative	22.2
	IBS16	60	F	142	constipation	lactulose, bisacodyl	Negative	0	Negative	19.8
	IBS17	43	F	404	fibromyalgia, constipation	glutamine	Negative	0	Negative	28
	IBS18	81	F	351	constipation, bloating, gastroesophageal reflux	macrogol, alverine citrate, simeticone	Negative	0	Negative	19
	IBS19	74	F	411	severe abdominal pain, sometimes intolerable	calcium, magnesium, celiprolol chlorhydrate	Negative	0	Negative	20.7
	IBS20	57	M	445	severe constipation, abdominal pain, sometimes intense	none	Negative	0	Positive	23.8
	IBS21	70	M	181	constipation	none	Negative	0	Negative	26.7
	IBS22	50	F	nd	bloating, constipation	ispaghul, lactulose, alverine citrate, simeticone, phloroglucinol dihydrate	Negative	0	Negative	na
	IBS23	56	F	410	constipation, severe abdominal pain	none	Negative	0	Negative	24.7
	IBS24	26	F	295	constipation	none	Negative	0	Negative	22.3
	IBS25	28	F	135	constipation	none	Negative	0	Negative	26.9
	IBS26	45	F	415	constipation, abdominal pain	macrogol, ispaghul, phloroglucinol dihydrate, alverine citrate, simeticone	Negative	0	Negative	17.7
	IBS27	28	F	263	constipation, abdominal pain that progresses by attacks	none	Negative	0	Negative	20.1
	IBS28	48	F	nd	constipation	none	Positive	3	Negative	na
	IBS29	64	F	nd	transit disorders, severe dyspeptic syndrome, nausea, vomiting	none	Positive	4	Positive	na
	IBS30	36	M	nd	constipation associated with abdominal pain with relatively long remissions	none	Positive	1	Negative	na
	IBS31	31	M	nd	constipation, abdominal meteorism	none	Positive	2 and 5	Negative	na
	IBS32	31	F	nd	constipation, painful attacks, bloating	macrogol	Positive	2	Positive	na
	IBS33	52	F	nd	severe constipation, fibromyalgia	none	Positive	2	Negative	na
	IBS34	75	M	nd	nocturnal abdominal pain, variable transit	none	Positive	4	Positive	na
	IBS35	66	M	nd	fibromyalgia	amitriptyline	Positive	3	Negative	na
Control group	T1	61	M	na	na	none	Negative	0	Negative	na
	T2	51	M	na	na	none	Positive	1	Negative	22.6
	T3	58	F	na	na	none	Negative	0	Negative	31.1
	T4	34	F	na	na	none	Negative	0	Positive	22.6
	T5	51	F	na	na	none	Negative	0	Negative	31.2
	T6	53	M	na	na	none	Negative	0	Negative	29
	T7	30	M	na	na	none	Positive	1	Negative	26.8
	T8	57	F	na	na	none	Positive	4	Negative	24.7
	T9	55	M	na	na	none	Positive	3	Negative	na
	T10	49	F	na	na	none	Negative	0	Negative	na
	T11	27	M	na	na	none	Positive	1	Negative	26.7
	T12	25	F	na	na	none	Positive	4	Negative	24.8
	T13	26	F	na	na	none	Negative	0	Negative	na
	T14	26	F	na	na	none	Negative	0	Negative	21.1
	T15	27	M	na	na	none	Negative	0	Negative	35.0
	T16	56	F	na	na	none	Negative	0	Positive	18.8
	T17	31	M	na	na	none	Positive	3	Negative	17.5
	T18	37	M	na	na	none	Positive	1	Negative	25.2
	T19	26	F	na	na	none	Positive	4	Negative	20.5
	T20	55	F	na	na	none	Negative	0	Negative	37.8
	T21	37	M	na	na	none	Positive	3	Negative	32.5
	T22	33	F	na	na	none	Positive	7	Negative	19.0
	T23	57	F	na	na	none	Negative	0	Positive	31.6
